# Supplementary material for: Assessing the risk of peripheral neuropathy among male tobacco smokers with type 2 diabetes: a matched case-control study in an Arabic-speaking country
Source: Research Square preprint supplement (doi:10.21203/rs.3.rs-5237206/v1), 2024-10-25
Supplement: Supplementary file 1 [file 70f6a5663d36bd8d0c3beba5.pdf]

## Questionnaire

Dear participants, thank you for agreeing to participate in this research study. You are invited to complete a survey to assess the effect of tobacco smoking on diabetic peripheral neuropathy. The survey is five pages long and should take you no more than 30 minutes to complete. We appreciate your thoughtful response in this survey.

Before you start the survey, kindly provide us with your preferred contact number:

\_\_\_\_\_

### **SECTION A: Sociodemographic characteristics data**

1. What is your current age? \_\_\_\_\_ years
2. What is your gender? \_\_\_\_\_
3. Ethnicity:  
0 Arab 1 Non-Arab
4. What is your education level? (Year of formal schooling)
  1. *Tertiary school or less*: any level of education less than undergraduate degree.
  2. *Undergraduate*: successfully completed an undergraduate degree level course at a college or university.
  3. *Higher degree*: a degree that is higher than bachelor's degree.
5. Family history of diabetes?  
0 No first-degree relatives with family history of diabetes  
1 First-degree relatives with a family history of diabetes
6. Which type of diabetes are you diagnosed with?
  1. Type 1 diabetes mellitus
  2. Type 2 diabetes mellitus
7. What was your age at diabetes diagnosis? \_\_\_\_\_ Years
8. How long have you been diagnosed with diabetes? \_\_\_\_\_ years
9. Are you diagnosed with diabetic neuropathy by a physician?  
0 No 1 Yes. If yes specify type \_\_\_\_\_ and age at diagnosis \_\_\_\_\_ years.
10. Are you diagnosed with high blood pressure?  
0 No 1 Yes
11. Do you have any other chronic conditions (diagnosed and being treated)?
  1. Heart diseases – if yes specify name \_\_\_\_\_

2. Kidney diseases – if yes specify name \_\_\_\_\_
3. Cancers – if yes specify name \_\_\_\_\_
4. Respiratory disease – if yes specify name \_\_\_\_\_
5. Other disease – if yes specify name \_\_\_\_\_
6. None

## ***SECTION B: Clinical and biochemical variables.***

### **12. The following data will be obtained from the patients' medical records.**

- a. HbA1C level: \_\_\_\_\_ %
- b. Height: \_\_\_\_\_ Centimetre
- c. Weight: \_\_\_\_\_ Kg
- d. LDL: \_\_\_\_\_ mg/dL
- e. TG: \_\_\_\_\_ mg/dL
- f. TC: \_\_\_\_\_ mg/dL
- g. Supplement intake (vitamin B complex): \_\_\_\_\_ 0 No 1 Yes
- h. Supplement intake (vitamin B6): \_\_\_\_\_ 0 No 1 Yes
- i. Starting treatment modality for diabetes  
0 Medical nutrition treatment 1 Oral hypoglycemics 2 Insulin
- j. Current treatment modality for diabetes:  
0 Medical nutrition treatment 1 Oral medications 2 Insulin 3. Oral  
Medications plus insulin 4. Oral plus injectable medications
- k. Do you take herbal supplements 0 No 1 Yes \_\_\_\_\_ If yes specify  
name \_\_\_\_\_ and duration \_\_\_\_\_ Yrs.
- l. Have you been diagnosed diabetic complications since DM diagnosis?
  1. Nephropathy
  2. Retinopathies
  3. Diabetic foot/ ulcer
  4. Peripheral artery disease
  5. Depression
  6. Sexual dysfunction
  7. None
  8. Others as diagnosed by the physician \_\_\_\_\_

### SECTION C: Smoking

#### 13. What is your smoking status?

0 Never smoker    1 Past smoker    2 Current smoker

**Note: If you are a never smoker, please skip to section E.**

#### 13.1 If you are a current or past smoker.

a. how old were you when have first smoked ever? \_\_\_\_\_ Years

b. how old were you when you started smoking regularly? \_\_\_\_\_ Years

#### 13.2 If you are a past smoker.

how old were you when you stopped smoking ever since? \_\_\_\_\_ Years

#### 14. If you are a current smoker, what type of tobacco do you consume?

0 Tobacco cigarette

1 Kreteks

2 Pipe full of tobacco

3 Shisha (Nargila, argileh, waterpipe / hookah)

4 Cigar

5 E-cigarettes (Vape)

6 Other, please specify: \_\_\_\_\_

#### 15. If you are a current smoker, how frequent do you smoke?

0 Less than daily    1 Daily

#### 16. On average, what is your daily consumption of smoking in the past 7 days?

\_\_\_\_\_

#### 17. If you are a current smoker, have you ever tried quitting smoking? If yes, how many times and for how long?

0 No    1 Yes \_\_\_\_\_ times, \_\_\_\_\_ (days, months, or years)

### SECTION F: Physical activity

This section will ask you about the time you spend doing different types of physical activity in a typical week. Please answer these questions even if you do not consider yourself to be a physically active person.

Think first about the time you spend doing work. Think of work as the things that you have to do such as paid or unpaid work, study/training, household chores, harvesting food/crops, fishing or hunting for food, seeking employment. *[Insert other examples if needed]*. In answering the following questions 'vigorous-intensity activities' are activities that require hard physical effort and cause large increases in breathing or heart rate, 'moderate-intensity activities' are activities that require moderate physical effort and cause small increases in breathing or heart rate.

#### 18. Does your work involve vigorous-intensity activity that causes large increases in breathing or heart rate like *[carrying or lifting heavy loads, digging or construction work]* for at least 10 minutes continuously?

1 Yes    0 No    If no, go to question 21

**19. In a typical week, on how many days do you do vigorous-intensity activities as part of your work?**

○ Number of days: \_\_\_\_\_

**20. How much time do you spend doing vigorous-intensity activities at work on a typical day?**

Minutes: \_\_\_\_\_ (If hours convert into minutes)

**21. Does your work involve moderate-intensity activity that causes small increases in breathing or heart rate such as brisk walking [*or carrying light loads*] for at least 10 minutes continuously?**

1 Yes    0 No    If no, go to question 24

**22. In a typical week, on how many days do you do moderate-intensity activities as part of your work?**

Number of days: \_\_\_\_\_

**23. How much time do you spend doing moderate-intensity activities at work on a typical day?**

Minutes: \_\_\_\_\_ (If hours convert into minutes)

The next questions exclude the physical activities at work that you have already mentioned.

Now I would like to ask you about the usual way you travel to and from places. For example, to work, for shopping, to market, to place of worship.

**24. Do you walk or use a bicycle (*pedal cycle*) for at least 10 minutes continuously to get to and from places?**

1 Yes    0 No    If no, go to question 27

**25. In a typical week, on how many days do you walk or bicycle for at least 10 minutes continuously to get to and from places?**

Number of days: \_\_\_\_\_

**26. How much time do you spend walking or bicycling for travel on a typical day?**

Minutes: \_\_\_\_\_ (If hours convert into minutes)

The next questions exclude the work and transport activities that you have already mentioned.

Now I would like to ask you about sports, fitness and recreational activities (*leisure*).

**27. Do you do any vigorous-intensity sports, fitness or recreational (*leisure*) activities that cause large increases in breathing or heart rate like [*running or football,*] for at least 10 minutes continuously?**

1 Yes    0 No    If no, go to question 30

**28. In a typical week, on how many days do you do vigorous-intensity sports, fitness or recreational (*leisure*) activities?**

Number of days: \_\_\_\_\_

**29. How much time do you spend doing vigorous-intensity sports, fitness or recreational activities on a typical day?**

Minutes: \_\_\_\_\_ (If hours convert into minutes)

**30. Do you do any moderate-intensity sports, fitness or recreational (*leisure*) activities that causes a small increase in breathing or heart rate such as brisk walking, (*cycling, swimming, volleyball*) for at least 10 minutes continuously?**

1 Yes 0 No      If no, go to question 33

**31. In a typical week, on how many days do you do moderate-intensity sports, fitness or recreational (*leisure*) activities?**

Number of days: \_\_\_\_\_

**32. How much time do you spend doing moderate-intensity sports, fitness or recreational (*leisure*) activities on a typical day?**

Minutes: \_\_\_\_\_ (If hours convert into minutes)

The following question is about sitting or reclining at work, at home, getting to and from places, or with friends including time spent [sitting at a desk, sitting with friends, travelling in car, bus, train, reading, playing cards, or watching television], but do not include time spent sleeping.

**33. How much time do you usually spend sitting or reclining on a typical day?**

Minutes: \_\_\_\_\_ (If hours convert into minutes)
